# Supplementary material
Source: ML conference proceedings conference paper supplement (https://openaccess.thecvf.com/content/CVPR2025/html/Madar_Tiled_Diffusion_CVPR_2025_paper.html)
Supplement: Supplementary file 1 [file Madar_Tiled_Diffusion_CVPR_2025_supplemental.zip]

Please refer to our website that contains everything (including code, paper and supplemental material):

<https://madaror.github.io/tiled-diffusion.github.io/>
